# Supplementary material for: Cyanogel-Derived Synthesis of Porous PdFe Nanohydrangeas as Electrocatalysts for Oxygen Reduction Reaction
Source: MDPI journal article supplement (doi:10.3390/nano11123382), 2021-12-13
Supplement: s1 [file s1]

# Supplementary Materials

## Cyanogel-Derived Synthesis of Porous PdFe Nanohydrangeas as Electrocatalysts for Oxygen Reduction Reaction

Jinxin Wan <sup>1,†</sup>, Zhenyuan Liu <sup>1,\*,†</sup>, Xiaoyu Yang <sup>2,†</sup>, Peng Cheng <sup>1</sup> and Chao Yan <sup>1,\*</sup>

<sup>1</sup> School of Materials Science and Engineering, Jiangsu University of Science and Technology, Zhenjiang 212100, China; wxj192060036@163.com (J.W.); 15851702806@163.com (P.C.)

<sup>2</sup> State Key Laboratory for Artificial Microstructure and Mesoscopic Physics, School of Physics, Peking University, Beijing 100871, China; yangxy1302@163.com

\* Correspondence: zhenyuanliu@just.edu.cn (Z.L.); chaoyan@just.edu.cn (C.Y.)

† These authors contributed equally to this paper.

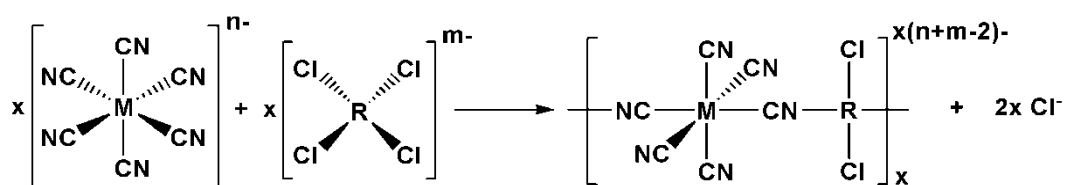

**Equation S1.** Formation equation of cyanogel from transition metal cyanometalates and tetrachlorometalates in aqueous solution.

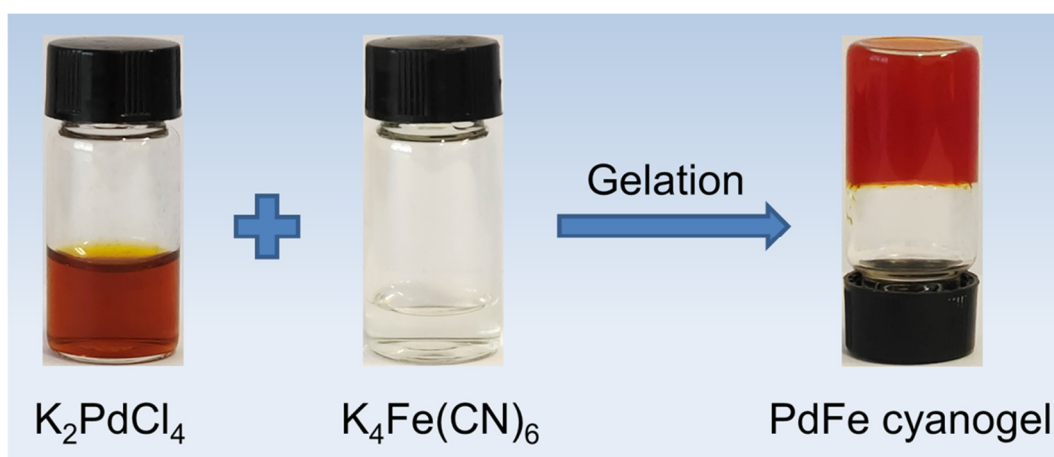

**Figure S1.** Digital photos showing the formation of PdFe cyanogel.

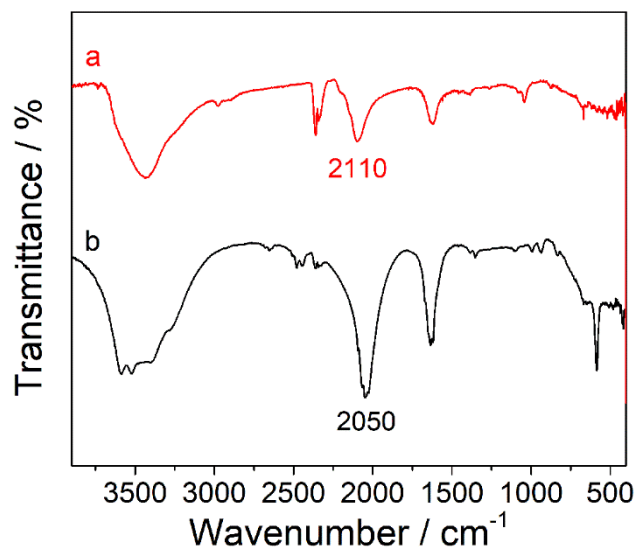

**Figure S2.** FTIR spectra of (a) the K<sub>2</sub>PdCl<sub>4</sub>/K<sub>4</sub>Fe(CN)<sub>6</sub> cyanogel and (b) pure K<sub>4</sub>Fe(CN)<sub>6</sub>.

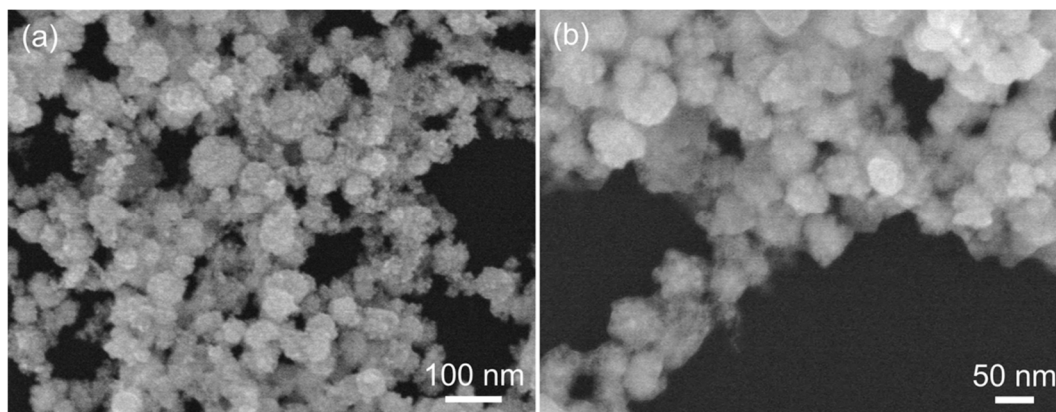

**Figure S3.** Typical SEM images of the porous PdFe nanohydrangeas at different magnifications.

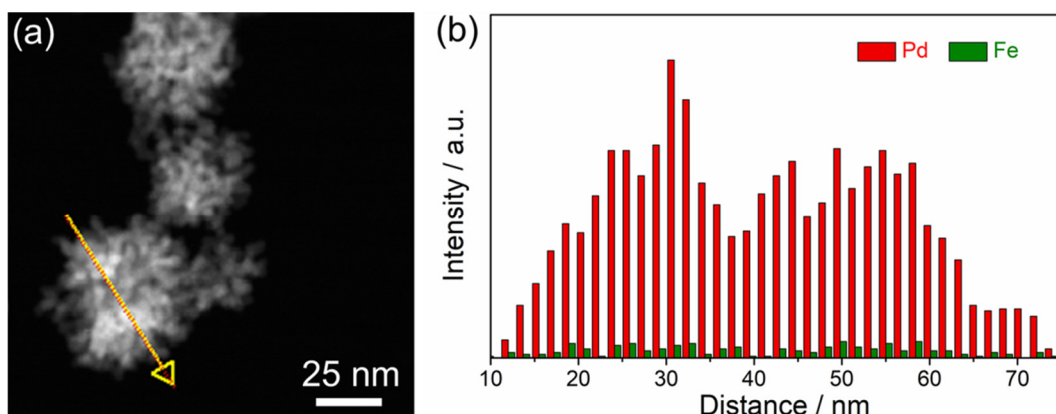

**Figure S4.** (a) STEM image and (b) EDX line scanning profile of the porous PdFe nanohydrangeas.

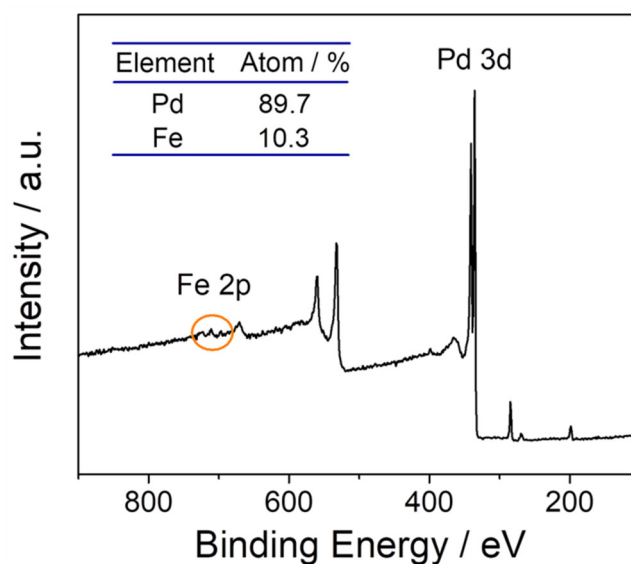

**Figure S5.** XPS survey scan spectrum of the porous PdFe nanohydrangeas.

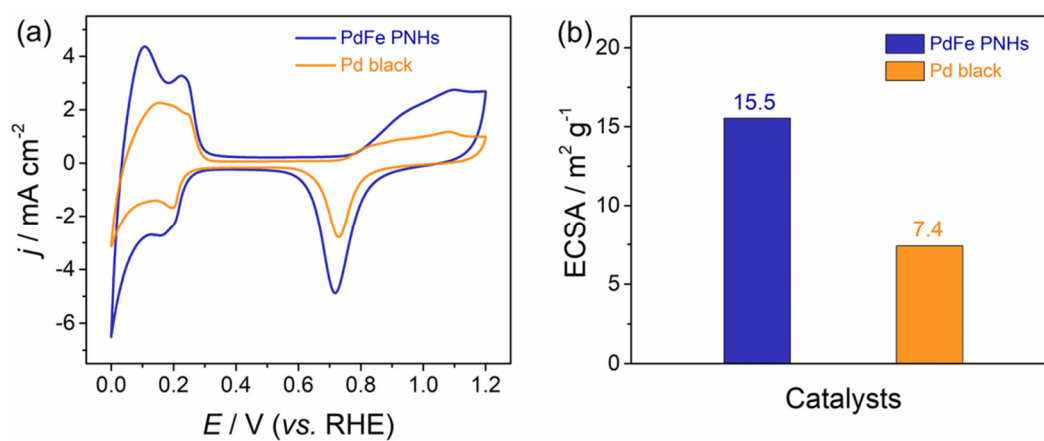

**Figure S6.** (a) CV curves of the as-synthesized porous PdFe nanohydrangeas and commercial Pd black catalyst recorded in N<sub>2</sub>-purged 0.5 M H<sub>2</sub>SO<sub>4</sub> solution with a sweep rate of 50 mV s<sup>-1</sup> and (b) Graphical comparison of the ECSA of the two catalysts.

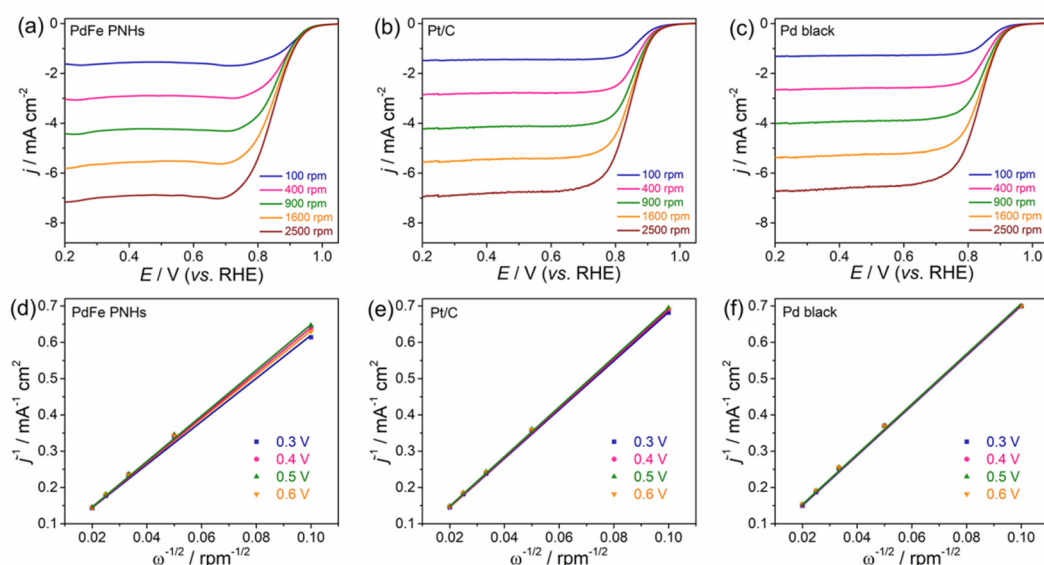

**Figure S7.** ORR polarization curves of the three catalysts obtained in O<sub>2</sub>-saturated 0.1 M KOH solution with a sweep rate of 5 mV s<sup>-1</sup> and different rotation speeds. (a) PdFe PNHs; (b) Commercial Pt/C; (c) Commercial Pd black. The relevant Koutecky-Levich plots at different potentials of the three catalysts. (d) PdFe PNHs; (e) Commercial Pt/C; (f) Commercial Pd black.

**Table S1.** Comparison of the ORR activity of the porous PdFe nanohydrangeas with other electrocatalysts previously reported.

| Catalyst               | $E_0$ / V    | $E_{1/2}$ / V | Electrolyte      | Ref              |
|------------------------|--------------|---------------|------------------|------------------|
| <b>PdFe PNHs</b>       | <b>0.988</b> | <b>0.861</b>  | <b>0.1 M KOH</b> | <b>this work</b> |
| <b>Pt/C</b>            | <b>0.976</b> | <b>0.858</b>  | <b>0.1 M KOH</b> | <b>this work</b> |
| <b>Pd black</b>        | <b>0.964</b> | <b>0.844</b>  | <b>0.1 M KOH</b> | <b>this work</b> |
| Pd NPAs                | 0.926        | 0.837         | 0.1 M KOH        | [1]              |
| Pt <sub>2</sub> Pd/NPG | 0.97         | 0.84          | 0.1 M KOH        | [2]              |
| Pd <sub>3</sub> Ni/C   | 0.96         | 0.85          | 0.1 M KOH        | [3]              |
| Pd <sub>3</sub> Cu/C   | 0.875        | 0.785         | 0.1 M KOH        | [4]              |
| PdZn                   | 0.98         | 0.82          | 0.1 M KOH        | [5]              |
| NiPd NPs/N-GR          | 0.961        | 0.82          | 0.1 M KOH        | [6]              |
| PdCu NTs               | 0.941        | 0.824         | 0.1 M KOH        | [7]              |
| MnPd <sub>3</sub> /C   | 0.953        | 0.80          | 0.1 M KOH        | [8]              |
| Pd <sub>2</sub> NiAg   | 0.923        | 0.842         | 0.1 M KOH        | [9]              |
| PdCo/NPC               | 0.928        | 0.843         | 0.1 M KOH        | [10]             |

## References

- Liu, S.L.; Mu, X.Q.; Duan, H.Y.; Chen, C.Y.; Zhang, H. Pd Nanoparticle Assemblies as Efficient Catalysts for the Hydrogen Evolution and Oxygen Reduction Reactions. *European Journal of Inorganic Chemistry* **2017**, 2017, 535-539.
- Zhong, X.; Qin, Y.Y.; Chen, X.L.; Xu, W.L.; Zhuang, G.; Li, X.N.; Wang, J.G. PtPd alloy embedded in nitrogen-rich graphene nanopores: High-performance bifunctional electrocatalysts for hydrogen evolution and oxygen reduction. *Carbon* **2017**, 114, 740-748.
- Goswami, C.; Saikia, H.; Tada, K.; Tanaka, S.; Sudarsanam, P.; Bhargava, S.K.; Bharali, P. Bimetallic Palladium-Nickel Nanoparticles Anchored on Carbon as High-Performance Electrocatalysts for Oxygen Reduction and Formic Acid Oxidation Reactions. *ACS Applied Energy Materials* **2020**, 3, 9285-9295.

4. Goswami, C.; Saikia, H.; Jyoti Borah, B.; Jyoti Kalita, M.; Tada, K.; Tanaka, S.; Bharali, P. Boosting the electrocatalytic activity of Pd/C by Cu alloying: Insight on Pd/Cu composition and reaction pathway. *Journal of Colloid and Interface Science* **2021**, *587*, 446-456.
5. Yang, H.Y.; Wang, K.; Tang, Z.H.; Liu, Z.; Chen, S.W. Bimetallic PdZn nanoparticles for oxygen reduction reaction in alkaline medium: The effects of surface structure. *Journal of Catalysis* **2020**, *382*, 181-191.
6. Thi, M.L.N.; Tran, T.H.; Anh, P.D.H.; Nhac-Vu, H.T.; Bui, Q.B. An innovative catalyst of nickel-palladium alloy nanocrystals embedded nitrogen-doped graphene for efficient oxygen reduction reaction. *Journal of Alloys and Compounds* **2019**, *797*, 314-324.
7. Wu, D.F.; Cheng, D.J. Structure-controlled synthesis of one-dimensional PdCu nanocatalysts via a seed-mediated approach for oxygen reduction reaction. *Applied Surface Science* **2019**, *493*, 139-145.
8. Lu, Y.N.; Zhao, S.L.; Yang, R.; Xu, D.D.; Yang, J.; Lin, Y.; Shi, N.E.; Dai, Z.H.; Bao, J.C.; Han, M. Well-Coupled Nanohybrids Obtained by Component-Controlled Synthesis and in Situ Integration of  $\text{Mn}_x\text{Pd}_y$  Nanocrystals on Vulcan Carbon for Electrocatalytic Oxygen Reduction. *ACS Applied Materials & Interfaces* **2018**, *10*, 8155-8164.
9. Liu, S.L.; Zhang, Q.H.; Li, Y.F.; Han, M.; Gu, L.; Nan, C.W.; Bao, J.C.; Dai, Z.H. Five-Fold Twinned  $\text{Pd}_2\text{NiAg}$  Nanocrystals with Increased Surface Ni Site Availability to Improve Oxygen Reduction Activity. *Journal of the American Chemical Society* **2015**, *137*, 2820-2823.
10. Xue, H.R.; Tang, J.; Gong, H.; Guo, H.; Fan, X.L.; Wang, T.; He, J.P.; Yamauchi, Y. Fabrication of PdCo Bimetallic Nanoparticles Anchored on Three-Dimensional Ordered N-Doped Porous Carbon as an Efficient Catalyst for Oxygen Reduction Reaction. *ACS Applied Materials & Interfaces* **2016**, *8*, 20766-20771.
